# Supplementary material for: Scoring and psychometric validation of the ‘Determinants of Intentions to Vaccinate’ (DIVA©) questionnaire
Source: Springer Nature journal article supplement (doi:10.1186/s12875-016-0539-3), 2016-10-10
Supplement: MOESM1 [file 10842902]

# Determinants of Intentions to Vaccinate

## Vaccination against *[the disease]*

Dear General Practitioner,

This questionnaire is designed to improve understanding of the **factors which influence your attitude towards vaccination against *[the disease]***.

Please **tick only one answer per question**.

Please **answer the questions honestly**. The information in this questionnaire will remain strictly **anonymous** and **confidential**.

**Thank you** in advance for your participation.

## DISEASE CHARACTERISTICS AND EXPECTED BENEFITS

| Concerning <u>your attitude towards prescribing the vaccine against [the disease]:</u>                                                          | Strongly discourages vaccination | Discourages vaccination  | Neither encourages nor discourages vaccination | Encourages vaccination   | Strongly encourages vaccination |
|-------------------------------------------------------------------------------------------------------------------------------------------------|----------------------------------|--------------------------|------------------------------------------------|--------------------------|---------------------------------|
| 1. is the <u>benefit to the community</u> a factor which...                                                                                     | <input type="checkbox"/>         | <input type="checkbox"/> | <input type="checkbox"/>                       | <input type="checkbox"/> | <input type="checkbox"/>        |
| 2. is the <u>benefit to the patient</u> a factor which...                                                                                       | <input type="checkbox"/>         | <input type="checkbox"/> | <input type="checkbox"/>                       | <input type="checkbox"/> | <input type="checkbox"/>        |
| 3. <u>is the efficacy of vaccination compared to that of other existing means of preventing [the disease]</u> a factor which...                 | <input type="checkbox"/>         | <input type="checkbox"/> | <input type="checkbox"/>                       | <input type="checkbox"/> | <input type="checkbox"/>        |
| 4. <u>is the efficacy of vaccination compared to that of the range of curative treatments available against [the disease]</u> a factor which... | <input type="checkbox"/>         | <input type="checkbox"/> | <input type="checkbox"/>                       | <input type="checkbox"/> | <input type="checkbox"/>        |
| 5. <u>is the diagnosis (easy or difficult) of [the disease]</u> a factor which...                                                               | <input type="checkbox"/>         | <input type="checkbox"/> | <input type="checkbox"/>                       | <input type="checkbox"/> | <input type="checkbox"/>        |
| 6. is the <u>prevalence</u> of [the disease] a factor which...                                                                                  | <input type="checkbox"/>         | <input type="checkbox"/> | <input type="checkbox"/>                       | <input type="checkbox"/> | <input type="checkbox"/>        |
| 7. is the <u>method of transmission</u> of [the disease] a factor which...                                                                      | <input type="checkbox"/>         | <input type="checkbox"/> | <input type="checkbox"/>                       | <input type="checkbox"/> | <input type="checkbox"/>        |
| 8. is the <u>degree of exposure of your patients to [the disease]</u> a factor which...                                                         | <input type="checkbox"/>         | <input type="checkbox"/> | <input type="checkbox"/>                       | <input type="checkbox"/> | <input type="checkbox"/>        |
| 9. is the <u>severity</u> of [the disease] a factor which...                                                                                    | <input type="checkbox"/>         | <input type="checkbox"/> | <input type="checkbox"/>                       | <input type="checkbox"/> | <input type="checkbox"/>        |

## PROPERTIES OF THE VACCINE

| Concerning <u>your attitude towards prescribing the vaccine against [the disease]:</u>                        | Strongly discourages vaccination | Discourages vaccination  | Neither encourages nor discourages vaccination | Encourages vaccination   | Strongly encourages vaccination |
|---------------------------------------------------------------------------------------------------------------|----------------------------------|--------------------------|------------------------------------------------|--------------------------|---------------------------------|
| 10. is the <u>risk/benefit ratio of the vaccine</u> against <i>[the disease]</i> a factor which...            | <input type="checkbox"/>         | <input type="checkbox"/> | <input type="checkbox"/>                       | <input type="checkbox"/> | <input type="checkbox"/>        |
| 11. is the <u>presence of other ingredients</u> in the vaccine against <i>[the disease]</i> a factor which... | <input type="checkbox"/>         | <input type="checkbox"/> | <input type="checkbox"/>                       | <input type="checkbox"/> | <input type="checkbox"/>        |
| 12. are the <u>strains</u> covered by the vaccine against <i>[the disease]</i> a factor which...              | <input type="checkbox"/>         | <input type="checkbox"/> | <input type="checkbox"/>                       | <input type="checkbox"/> | <input type="checkbox"/>        |
| 13. is the <u>duration of immunisation</u> of the vaccine against <i>[the disease]</i> a factor which...      | <input type="checkbox"/>         | <input type="checkbox"/> | <input type="checkbox"/>                       | <input type="checkbox"/> | <input type="checkbox"/>        |
| 14. is the <u>efficacy of the vaccine</u> against <i>[the disease]</i> a factor which...                      | <input type="checkbox"/>         | <input type="checkbox"/> | <input type="checkbox"/>                       | <input type="checkbox"/> | <input type="checkbox"/>        |
| 15. is the level of <u>risk of inducing [the disease]</u> via the vaccine a factor which...                   | <input type="checkbox"/>         | <input type="checkbox"/> | <input type="checkbox"/>                       | <input type="checkbox"/> | <input type="checkbox"/>        |
| 16. is the <u>safety of the vaccine</u> against <i>[the disease]</i> a factor which...                        | <input type="checkbox"/>         | <input type="checkbox"/> | <input type="checkbox"/>                       | <input type="checkbox"/> | <input type="checkbox"/>        |
| 17. is the <u>method of administration of the vaccine</u> against <i>[the disease]</i> a factor which...      | <input type="checkbox"/>         | <input type="checkbox"/> | <input type="checkbox"/>                       | <input type="checkbox"/> | <input type="checkbox"/>        |
| 18. is the existence - or not - of <u>combined vaccines</u> against <i>[the disease]</i> a factor which...    | <input type="checkbox"/>         | <input type="checkbox"/> | <input type="checkbox"/>                       | <input type="checkbox"/> | <input type="checkbox"/>        |
| 19. is the <u>availability</u> of the vaccine against <i>[the disease]</i> a factor which...                  | <input type="checkbox"/>         | <input type="checkbox"/> | <input type="checkbox"/>                       | <input type="checkbox"/> | <input type="checkbox"/>        |

## INFORMATION ABOUT THE VACCINATION

| Concerning <u>your attitude towards prescribing the vaccine against [the disease]:</u>                                              | Strongly discourages vaccination | Discourages vaccination  | Neither encourages nor discourages vaccination | Encourages vaccination   | Strongly encourages vaccination |
|-------------------------------------------------------------------------------------------------------------------------------------|----------------------------------|--------------------------|------------------------------------------------|--------------------------|---------------------------------|
| 20. is the <u>current vaccination schedule</u> a factor which...                                                                    | <input type="checkbox"/>         | <input type="checkbox"/> | <input type="checkbox"/>                       | <input type="checkbox"/> | <input type="checkbox"/>        |
| 21. is the <u>availability of documentation for your patients</u> at the surgery a factor which...                                  | <input type="checkbox"/>         | <input type="checkbox"/> | <input type="checkbox"/>                       | <input type="checkbox"/> | <input type="checkbox"/>        |
| 22. is the content of the <u>scientific literature</u> available to you a factor which...                                           | <input type="checkbox"/>         | <input type="checkbox"/> | <input type="checkbox"/>                       | <input type="checkbox"/> | <input type="checkbox"/>        |
| 23. is the <u>communication from NHS England or your CCG</u> on this subject a factor which...                                      | <input type="checkbox"/>         | <input type="checkbox"/> | <input type="checkbox"/>                       | <input type="checkbox"/> | <input type="checkbox"/>        |
| 24. is the <u>communication from health institutions (Public Health England, NICE, CQC, etc.)</u> on this subject a factor which... | <input type="checkbox"/>         | <input type="checkbox"/> | <input type="checkbox"/>                       | <input type="checkbox"/> | <input type="checkbox"/>        |
| 25. is the <u>communication from the Department of Health</u> on this subject a factor which...                                     | <input type="checkbox"/>         | <input type="checkbox"/> | <input type="checkbox"/>                       | <input type="checkbox"/> | <input type="checkbox"/>        |
| 26. is the content of the <u>information</u> supplied <u>by the pharmaceutical companies</u> a factor which...                      | <input type="checkbox"/>         | <input type="checkbox"/> | <input type="checkbox"/>                       | <input type="checkbox"/> | <input type="checkbox"/>        |
| 27. is the content of the <u>information</u> communicated <u>by the media</u> a factor which...                                     | <input type="checkbox"/>         | <input type="checkbox"/> | <input type="checkbox"/>                       | <input type="checkbox"/> | <input type="checkbox"/>        |

## PRACTICAL AND ORGANISATIONAL ASPECTS

| Concerning <u>your attitude towards prescribing the vaccine against [the disease]:</u>                                      | Strongly discourages vaccination | Discourages vaccination  | Neither encourages nor discourages vaccination | Encourages vaccination   | Strongly encourages vaccination |
|-----------------------------------------------------------------------------------------------------------------------------|----------------------------------|--------------------------|------------------------------------------------|--------------------------|---------------------------------|
| 28. is <u>the GP's role in the vaccination process</u> a factor which...                                                    | <input type="checkbox"/>         | <input type="checkbox"/> | <input type="checkbox"/>                       | <input type="checkbox"/> | <input type="checkbox"/>        |
| 29. are the <u>alert settings in your electronic patient records</u> a factor which...                                      | <input type="checkbox"/>         | <input type="checkbox"/> | <input type="checkbox"/>                       | <input type="checkbox"/> | <input type="checkbox"/>        |
| 30. are <u>reminder messages from specialists</u> or from occupational healthcare professionals a factor which...           | <input type="checkbox"/>         | <input type="checkbox"/> | <input type="checkbox"/>                       | <input type="checkbox"/> | <input type="checkbox"/>        |
| 31. is the <u>time needed to follow up, talk about and explain this vaccination</u> during a consultation a factor which... | <input type="checkbox"/>         | <input type="checkbox"/> | <input type="checkbox"/>                       | <input type="checkbox"/> | <input type="checkbox"/>        |
| 32. is the <u>financial cost to the community</u> a factor which...                                                         | <input type="checkbox"/>         | <input type="checkbox"/> | <input type="checkbox"/>                       | <input type="checkbox"/> | <input type="checkbox"/>        |
| 33. is the <u>patient-doctor relationship</u> a factor which...                                                             | <input type="checkbox"/>         | <input type="checkbox"/> | <input type="checkbox"/>                       | <input type="checkbox"/> | <input type="checkbox"/>        |

## ADAPTATION TO THE PATIENT'S PROFILE

| Concerning <u>your attitude towards prescribing the vaccine against [the disease]</u> :                                                  | Strongly discourages vaccination | Discourages vaccination  | Neither encourages nor discourages vaccination | Encourages vaccination   | Strongly encourages vaccination |
|------------------------------------------------------------------------------------------------------------------------------------------|----------------------------------|--------------------------|------------------------------------------------|--------------------------|---------------------------------|
| 34. is the <u>availability of information on whether the patient has already been vaccinated against [the disease]</u> a factor which... | <input type="checkbox"/>         | <input type="checkbox"/> | <input type="checkbox"/>                       | <input type="checkbox"/> | <input type="checkbox"/>        |
| 35. are the <u>patient's travel plans</u> a factor which...                                                                              | <input type="checkbox"/>         | <input type="checkbox"/> | <input type="checkbox"/>                       | <input type="checkbox"/> | <input type="checkbox"/>        |
| 36. is the fact that a patient belongs to a <u>risk group</u> with regards to <u>[the disease]</u> a factor which...                     | <input type="checkbox"/>         | <input type="checkbox"/> | <input type="checkbox"/>                       | <input type="checkbox"/> | <input type="checkbox"/>        |
| 37. is the consultation of a <u>new patient</u> a factor which...                                                                        | <input type="checkbox"/>         | <input type="checkbox"/> | <input type="checkbox"/>                       | <input type="checkbox"/> | <input type="checkbox"/>        |
| 38. is a consultation for an <u>acute illness</u> a factor which...                                                                      | <input type="checkbox"/>         | <input type="checkbox"/> | <input type="checkbox"/>                       | <input type="checkbox"/> | <input type="checkbox"/>        |
| 39. is a consultation for a <u>chronic illness</u> a factor which...                                                                     | <input type="checkbox"/>         | <input type="checkbox"/> | <input type="checkbox"/>                       | <input type="checkbox"/> | <input type="checkbox"/>        |
| 40. is the <u>multiple morbidity of a patient</u> a factor which...                                                                      | <input type="checkbox"/>         | <input type="checkbox"/> | <input type="checkbox"/>                       | <input type="checkbox"/> | <input type="checkbox"/>        |
| 41. are <u>patients' knowledge</u> and <u>preconceived ideas</u> about the vaccination against <u>[the disease]</u> a factor which...    | <input type="checkbox"/>         | <input type="checkbox"/> | <input type="checkbox"/>                       | <input type="checkbox"/> | <input type="checkbox"/>        |
| 42. is the <u>link between [the disease] and taboos, beliefs or behavioural norms</u> a factor which...                                  | <input type="checkbox"/>         | <input type="checkbox"/> | <input type="checkbox"/>                       | <input type="checkbox"/> | <input type="checkbox"/>        |
| 43. is the <u>level of acceptance by your patients</u> of the vaccination against <u>[the disease]</u> a factor which...                 | <input type="checkbox"/>         | <input type="checkbox"/> | <input type="checkbox"/>                       | <input type="checkbox"/> | <input type="checkbox"/>        |
| 44. is the <u>cost to be covered by your patients</u> for vaccination against <u>[the disease]</u> a factor which...                     | <input type="checkbox"/>         | <input type="checkbox"/> | <input type="checkbox"/>                       | <input type="checkbox"/> | <input type="checkbox"/>        |

## GENERAL PRACTITIONER'S INDIVIDUAL EXPERIENCE

| Concerning <u>your attitude towards prescribing the vaccine against [the disease]</u> :                                                                     | Strongly discourages vaccination | Discourages vaccination  | Neither encourages nor discourages vaccination | Encourages vaccination   | Strongly encourages vaccination |
|-------------------------------------------------------------------------------------------------------------------------------------------------------------|----------------------------------|--------------------------|------------------------------------------------|--------------------------|---------------------------------|
| 45. are the <u>characteristics of the population</u> you treat (age, sex, geographic location, etc.) a factor which...                                      | <input type="checkbox"/>         | <input type="checkbox"/> | <input type="checkbox"/>                       | <input type="checkbox"/> | <input type="checkbox"/>        |
| 46. is the degree of <u>difficulty in identifying the target population</u> for vaccination against <u>[the disease]</u> a factor which...                  | <input type="checkbox"/>         | <input type="checkbox"/> | <input type="checkbox"/>                       | <input type="checkbox"/> | <input type="checkbox"/>        |
| 47. are the <u>cases of [the disease]</u> encountered within the <u>scope of your professional experience</u> a factor which...                             | <input type="checkbox"/>         | <input type="checkbox"/> | <input type="checkbox"/>                       | <input type="checkbox"/> | <input type="checkbox"/>        |
| 48. is your <u>experience</u> of the <u>vaccination</u> against <u>[the disease]</u> <u>on a personal level</u> (yourself or your family) a factor which... | <input type="checkbox"/>         | <input type="checkbox"/> | <input type="checkbox"/>                       | <input type="checkbox"/> | <input type="checkbox"/>        |
| 49. is your <u>experience</u> of <u>[the disease]</u> <u>on a personal level</u> (yourself or your family) a factor which...                                | <input type="checkbox"/>         | <input type="checkbox"/> | <input type="checkbox"/>                       | <input type="checkbox"/> | <input type="checkbox"/>        |

## GENERAL PRACTITIONER'S COMMITMENT TO THE VACCINATION APPROACH

| <u>During a consultation with a patient at risk of [the disease],</u>                                                             | Totally disagree         | Somewhat disagree        | Somewhat agree           | Totally agree            |
|-----------------------------------------------------------------------------------------------------------------------------------|--------------------------|--------------------------|--------------------------|--------------------------|
| 50. <u>I raise the subject</u> of vaccination against <u>[the disease]</u>                                                        | <input type="checkbox"/> | <input type="checkbox"/> | <input type="checkbox"/> | <input type="checkbox"/> |
| 51. <u>I prescribe</u> vaccination against <u>[the disease]</u>                                                                   | <input type="checkbox"/> | <input type="checkbox"/> | <input type="checkbox"/> | <input type="checkbox"/> |
| 52. <u>I insist</u> on vaccination against <u>[the disease]</u> if the <u>patient is reluctant</u>                                | <input type="checkbox"/> | <input type="checkbox"/> | <input type="checkbox"/> | <input type="checkbox"/> |
| 53. <u>I make sure</u> that my <u>prescription</u> for vaccination against <u>[the disease]</u> has been properly <u>followed</u> | <input type="checkbox"/> | <input type="checkbox"/> | <input type="checkbox"/> | <input type="checkbox"/> |

| <u>In general,</u>                                                                                                         | Totally disagree         | Somewhat disagree        | Somewhat agree           | Totally agree            |
|----------------------------------------------------------------------------------------------------------------------------|--------------------------|--------------------------|--------------------------|--------------------------|
| 54. vaccination against <u>[the disease]</u> is <u>a subject that interests me</u>                                         | <input type="checkbox"/> | <input type="checkbox"/> | <input type="checkbox"/> | <input type="checkbox"/> |
| 55. my <u>attitude towards prescribing the vaccine</u> against <u>[the disease]</u> is <u>in agreement with my beliefs</u> | <input type="checkbox"/> | <input type="checkbox"/> | <input type="checkbox"/> | <input type="checkbox"/> |

**Thank you for your time.**
